# Supplementary material for: 1-D velocity structure modelling of the Earth's Crust in the NW Dinarides
Source: Copernicus journal article supplement (doi:10.5194/se-2021-67), 2021-06-21
Supplement: Supplementary file [file se-2021-67-AC2-supplement.pdf]

## Supplement - Relocation figures

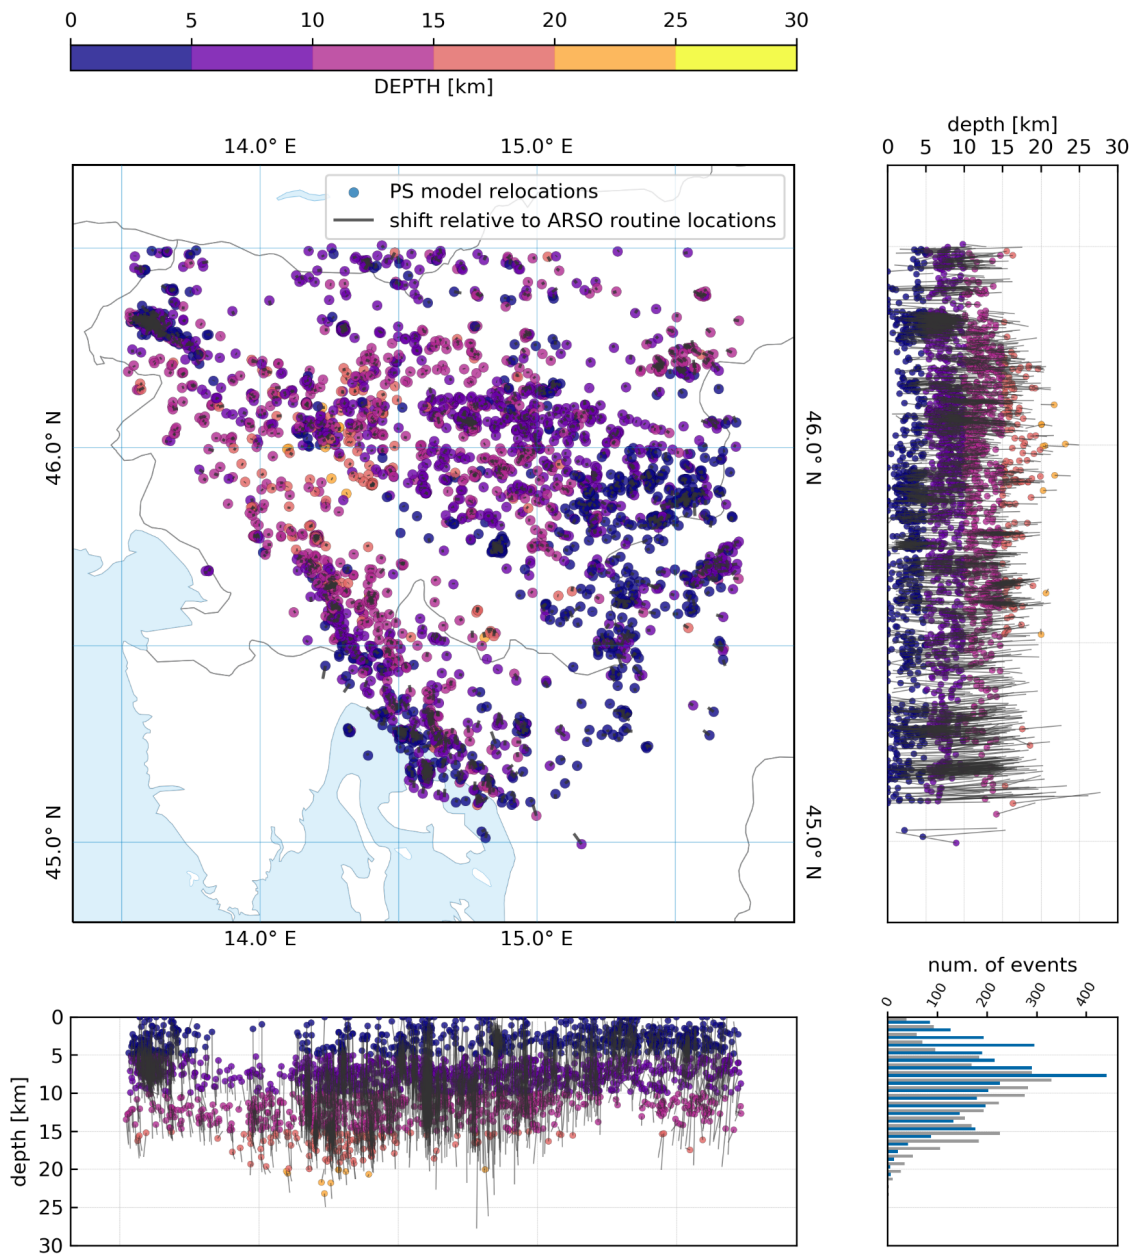

**Figure S1:** Proposed replacement for Figure 11 with lines showing the shift of relocated hypocenters relative to the routine locations.

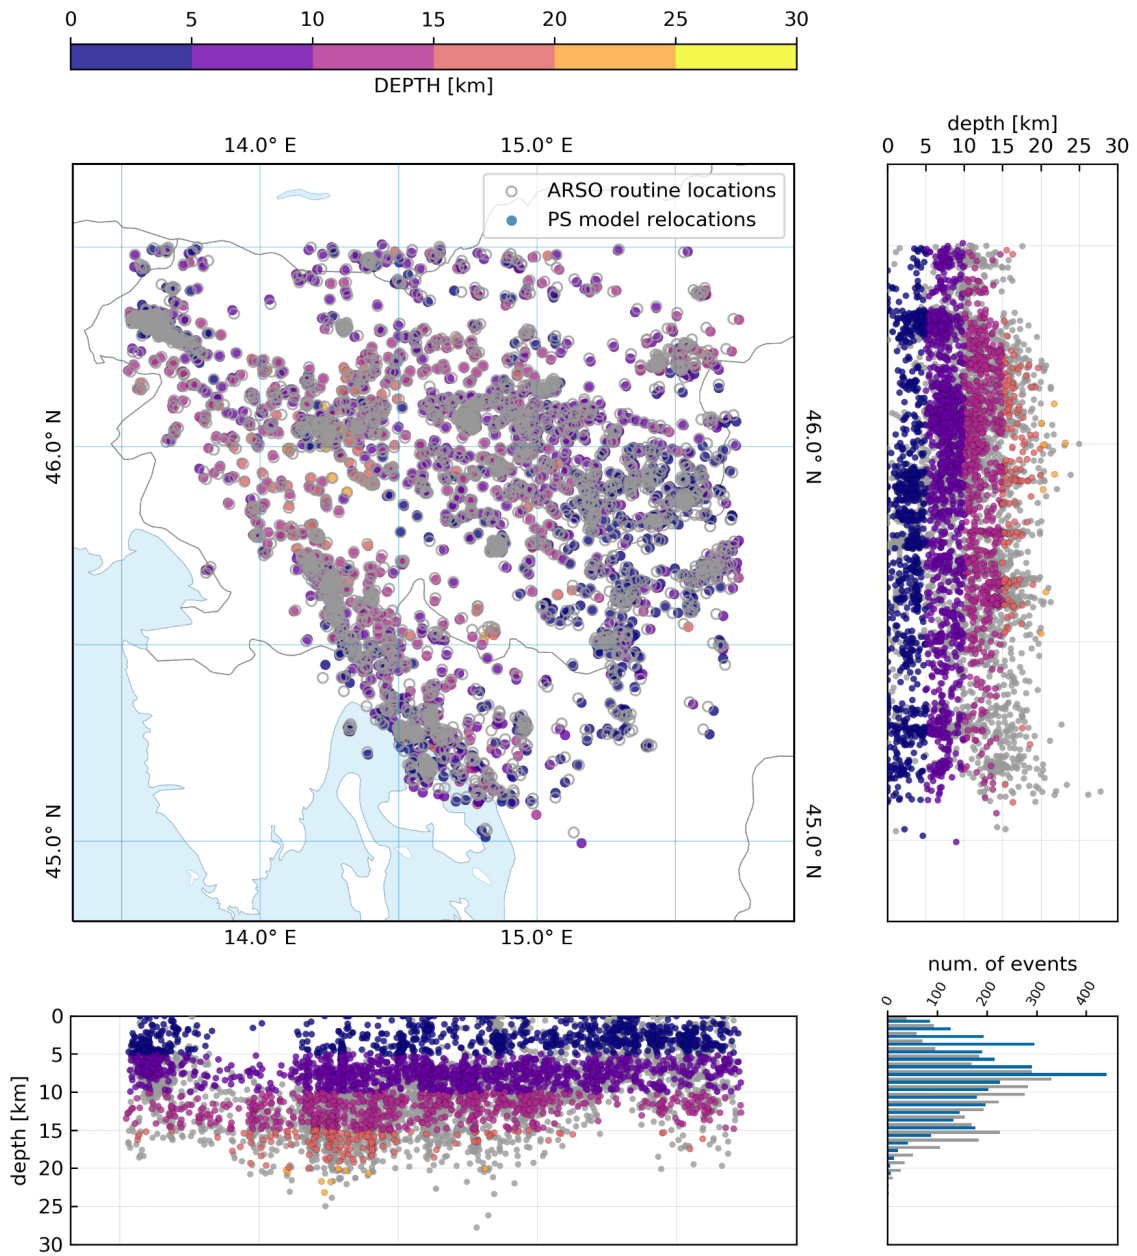

**Figure S2:** Proposed replacement for Figure 11 with open circles instead of filled ones for the routine locations.

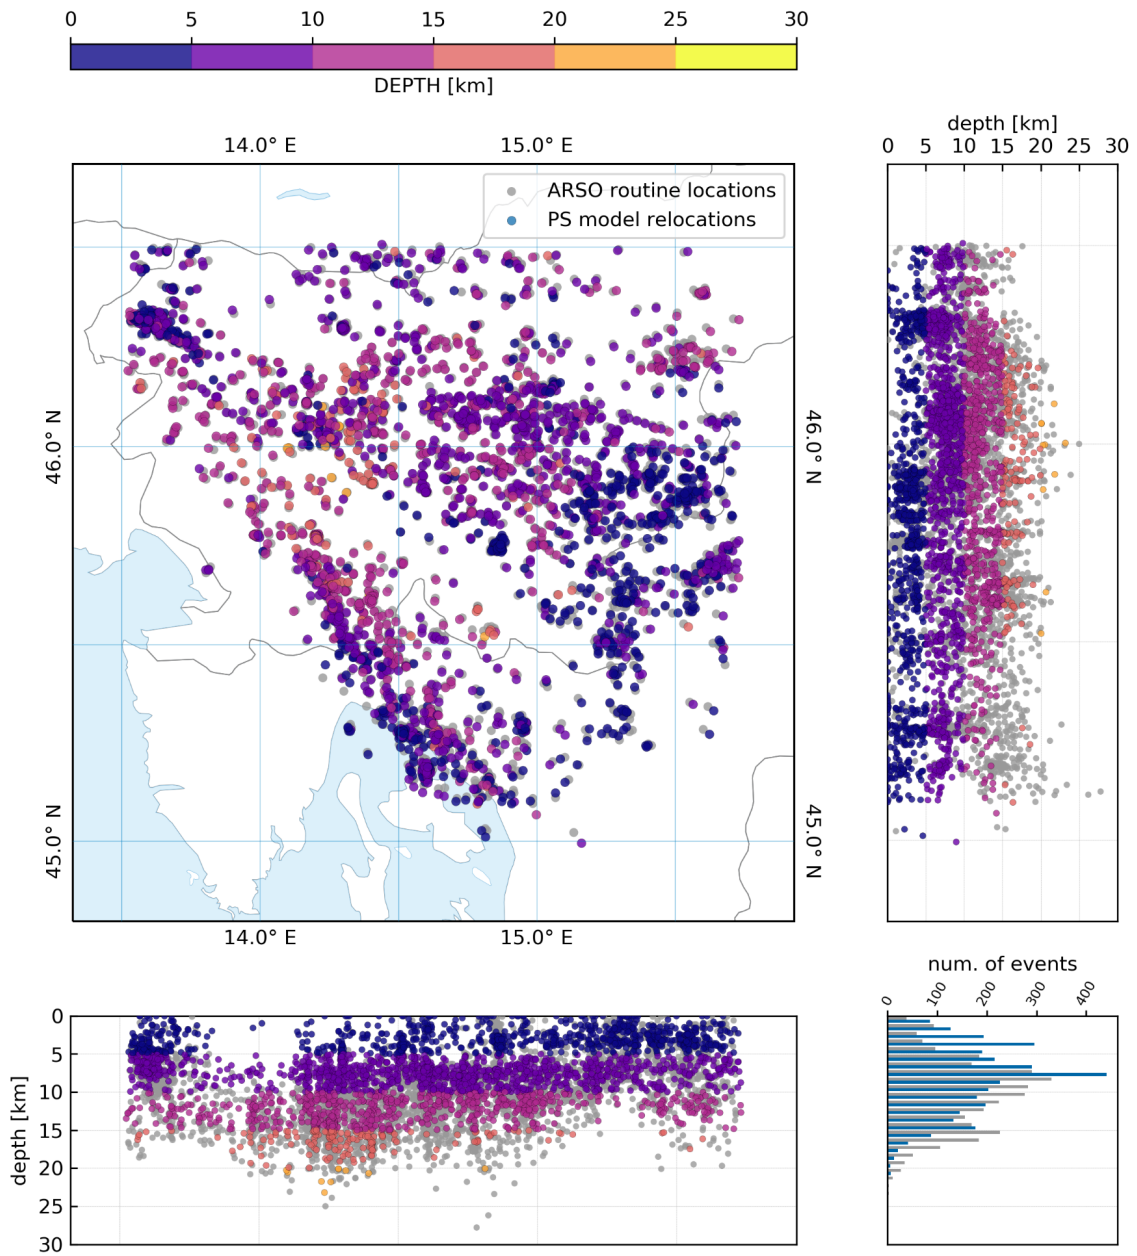

**Figure S3:** Final replacement for Figure 11 with smaller markers on the main map and relocated hypocenters put on the top of the routine hypocenters.
